# Supplementary material for: A novel Co-based MOF/Pd composite: synergy of charge-transfer towards the electrocatalytic oxygen evolution reaction
Source: Royal Society of Chemistry journal article supplement (doi:10.1039/d0ce01747g), 2021-01-01
Supplement: d0ce01747g1.pdf [file d0ce01747g1.pdf]

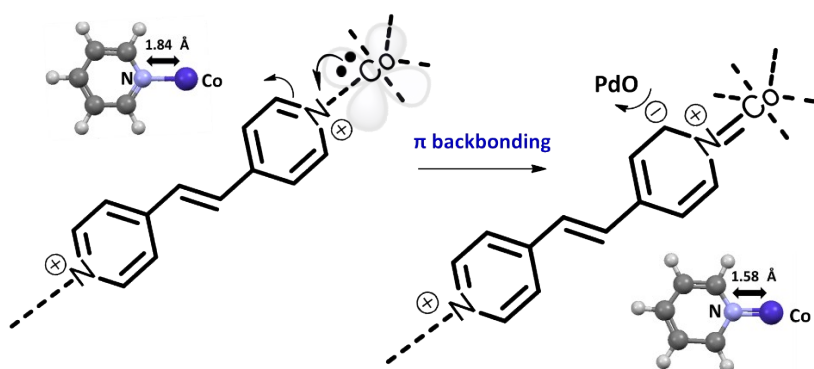

**Fig. S1** - Resonance structures and double bond stabilization produced by a retro-donation effect.

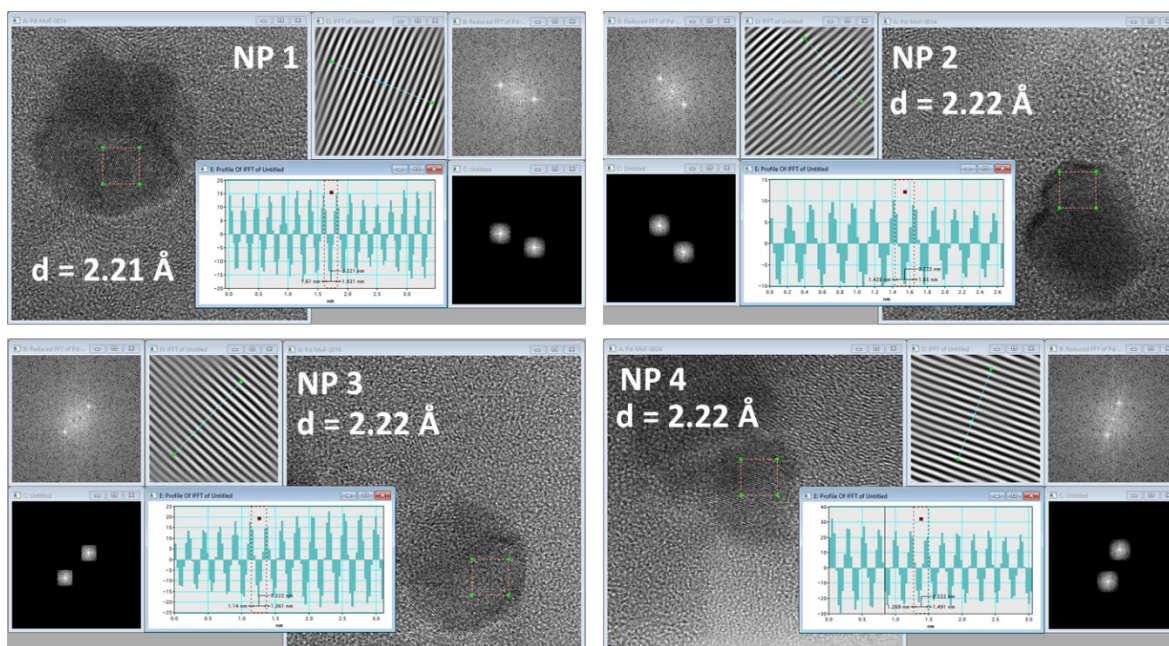

**Fig. S2** – Measurement of the interplanar distance for the LEEL-037/Pd-C composite

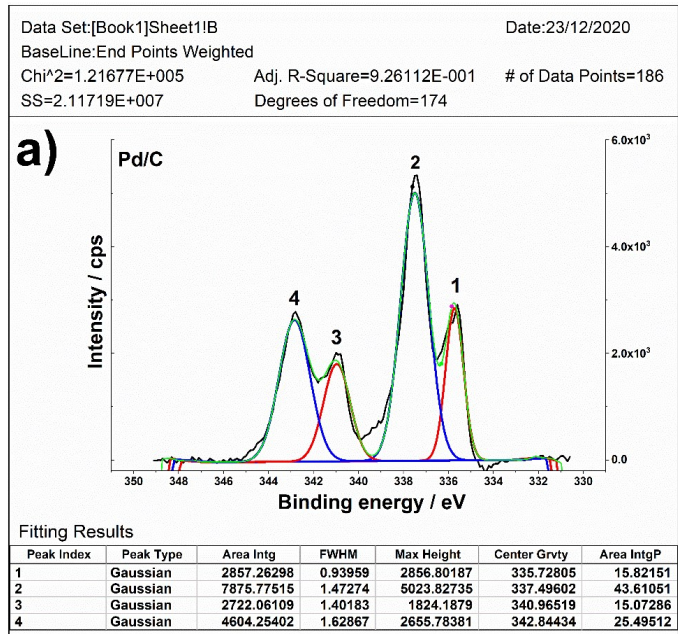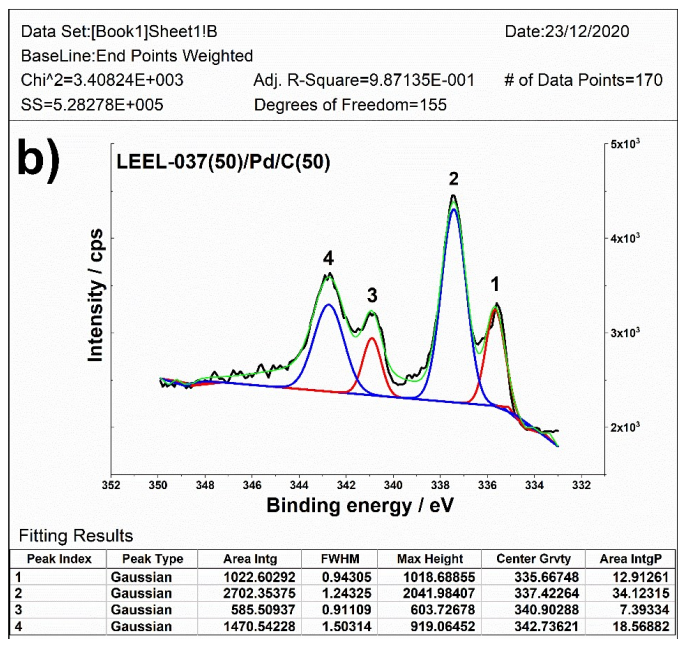

**Fig. S3** – Peaks analysis to determine the Pd and PdO percentage in a) Pd/C and b) LEEL-037(50)/Pd/C(50) electrocatalysts

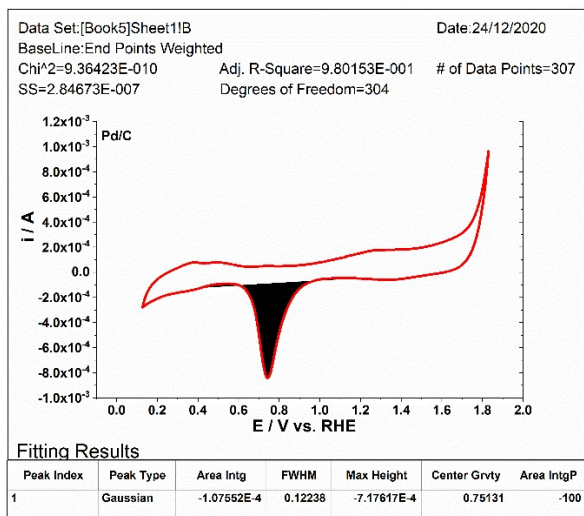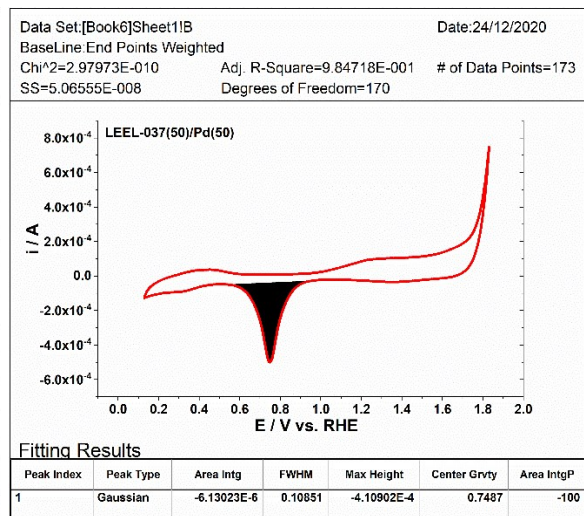

Fig. S4 – Coulombic charge determination for Pd/C (left) and LEEL-037(50)/Pd-C(50) (right)
