# Supplementary material for: A novel Co-based MOF/Pd composite: synergy of charge-transfer towards the electrocatalytic oxygen evolution reaction
Source: Royal Society of Chemistry journal article supplement (doi:10.1039/d0ce01747g), 2021-01-01
Supplement: d0ce01747g2.pdf [file d0ce01747g2.pdf]

**Table S1. Electrocatalysts composition**

| Electrocatalyst       | Vulcan Carbon XC-72 (wt.%) | Vulcan Carbon XC-72 (mg) | Pd (wt.%) | Pd (mg) | LEEL-037 (wt.%) | LEEL-037 (mg) |
|-----------------------|----------------------------|--------------------------|-----------|---------|-----------------|---------------|
| Pd/C                  | 70                         | 7                        | 30        | 3       | 0               | 0             |
| LEEL-037(25)/Pd-C(75) | 52.5                       | 5.25                     | 22.5      | 2.25    | 25              | 2.5           |
| LEEL-037(50)/Pd-C(50) | 35                         | 3.5                      | 15        | 1.5     | 50              | 5             |
| LEEL-037(75)/Pd-C(25) | 15                         | 1.5                      | 7.5       | .75     | 75              | 7.5           |

**Table S2. Comparison of physicochemical and electrocatalytic properties for Ru and Ir free electrocatalysts used to carry out the OER in alkaline medium.**

| Material                                                   | Operational overpotential at 10 mA/cm <sup>2</sup> (mV) | Tafel slope (mV dec <sup>-1</sup> ) | Crystal size (nm) | Electrolyte | Reference |
|------------------------------------------------------------|---------------------------------------------------------|-------------------------------------|-------------------|-------------|-----------|
| LEEL-037(25)/Pd-C(75)                                      | 430                                                     | 173                                 | 30.80*            | KOH 0.5 M   | This work |
| LEEL-037                                                   | 480                                                     | 104                                 | 35.80             | KOH 0.5 M   | This work |
| Ni-Co@carbon                                               | 243                                                     | 67                                  | ---               | KOH 1.0 M   | [3]       |
| Co <sub>3</sub> O <sub>4</sub> /NC                         | 325                                                     | 80                                  | ---               | KOH 1.0 M   | [4]       |
| Ni-BDC                                                     | 360                                                     | 57                                  | 45.03             | KOH 1.0 M   | [5]       |
| Ni <sub>0.75</sub> Fe <sub>0.25</sub> BDC                  | 310                                                     | 43.7                                | 17.11             | KOH 0.1 M   | [6]       |
| Fe@BIF-91                                                  | 350                                                     | 71                                  | 63.72             | KOH 1.0 M   | [7]       |
| ZIF-67/CoNiAl-LDH/NF                                       | 303                                                     | 88                                  | 46.23             | KOH 1.0 M   | [8]       |
| FeNi@CNF                                                   | 356                                                     | 62.6                                | 21.89             | KOH 1.0 M   | [9]       |
| β-Ni(OH) <sub>2</sub> /Cu <sub>2</sub> S hybrid nanosheets | 500                                                     | 89                                  | 29.1              | KOH 0.1 M   | [10]      |
| NiTe                                                       | 388                                                     | 117                                 | 27.98             | KOH 1.0 M   | [11]      |
| Co <sub>3</sub> O <sub>4</sub>                             | 394                                                     | 149.6                               | 14.36             | KOH 1.0 M   | [12]      |
| Fe <sub>2</sub> P@NPC                                      | 510                                                     | 140                                 | ----              | KOH 1.0 M   | [13]      |
| NiFeP@PC                                                   | 460                                                     | 131                                 | 25.68             |             |           |
| Ni <sub>2</sub> P@NPC                                      | 440                                                     | 110                                 | 13                |             |           |

|                                           |     |      |       |           |      |
|-------------------------------------------|-----|------|-------|-----------|------|
| Ni <sub>1.5</sub> Fe <sub>0.5</sub> P@NPC | 410 | 87   | 26.9  |           |      |
| CoP@NG                                    | 354 | 63.8 | 17.95 | KOH 1.0 M | [14] |
| ZnO@NMC<br>nanocomposite                  | 570 | 318  | 41.75 | KOH 0.5 M | [15] |

\*Crystallite size calculated at the main diffraction peak (2θ) for Pd/C (40.3°).

**Table S3. Calculated values of the equivalent circuit elements for the samples**

| Sample                | Rs (Ω) | CPE-T                 | CPE-P  | Rct (Ω) | χ <sup>2</sup>       |
|-----------------------|--------|-----------------------|--------|---------|----------------------|
| Pd/C                  | 32.22  | 3.8X10 <sup>-4</sup>  | 0.8176 | 80.13   | 2.5X10 <sup>-3</sup> |
| MOF                   | 32.85  | 1.8X10 <sup>-4</sup>  | 0.6886 | 64.20   | 1.9X10 <sup>-3</sup> |
| LEEL-037(25)/Pd-C(75) | 33.80  | 9 X10 <sup>-5</sup>   | 0.7558 | 36.42   | 2.6X10 <sup>-3</sup> |
| LEEL-037(50)/Pd-C(50) | 33.70  | 6.9 X10 <sup>-4</sup> | 0.6909 | 52.02   | 1.7X10 <sup>-3</sup> |
| LEEL-037(75)/Pd-C(25) | 33.23  | 2.2 X10 <sup>-4</sup> | 0.6968 | 64.27   | 2.2X10 <sup>-3</sup> |
