# Supplementary material for: A novel Co-based MOF/Pd composite: synergy of charge-transfer towards the electrocatalytic oxygen evolution reaction
Source: Royal Society of Chemistry journal article supplement (doi:10.1039/d0ce01747g), 2021-01-01
Supplement: d0ce01747g3.pdf [file d0ce01747g3.pdf]

## Supplementary Information

### A novel Co-based MOF/Pd composite: synergy of charge-transfer towards the electrocatalytic oxygen evolution reaction

Luis A. Alfonso-Herrera<sup>a</sup>, Leticia M. Torres-Martínez<sup>a,b</sup> and J.Manuel Mora-Hernandez<sup>c,\*</sup>

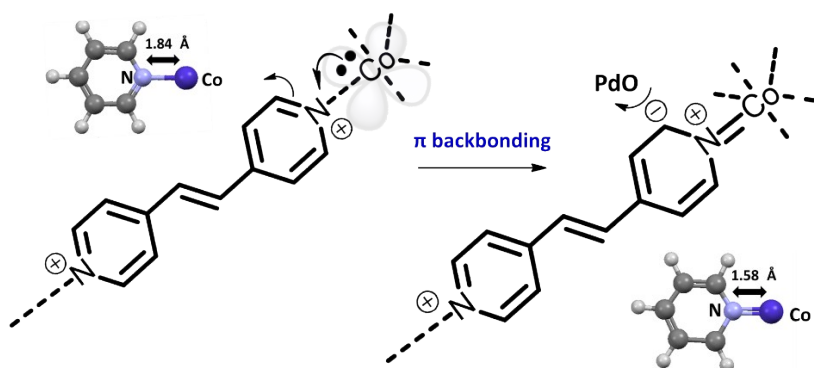

Fig. S1 - Resonance structures and double bond stabilization produced by a retro-donation effect

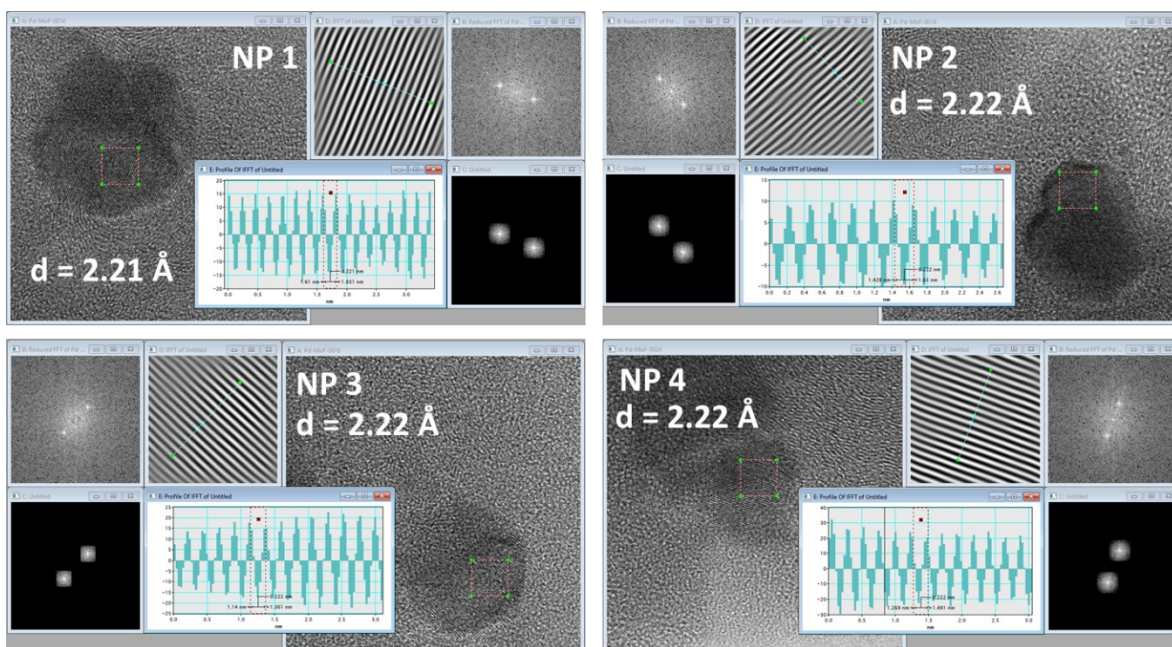

Fig. S2 – Measurement of the interplanar distance for the LEEL-037/Pd-C composite

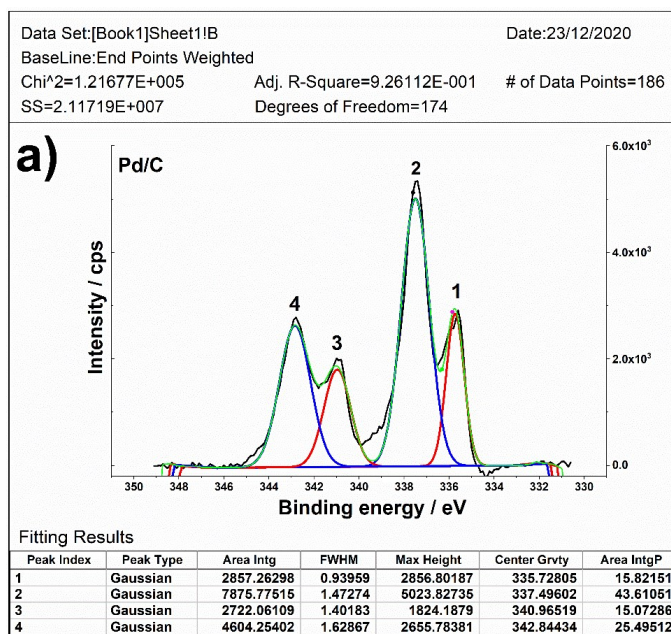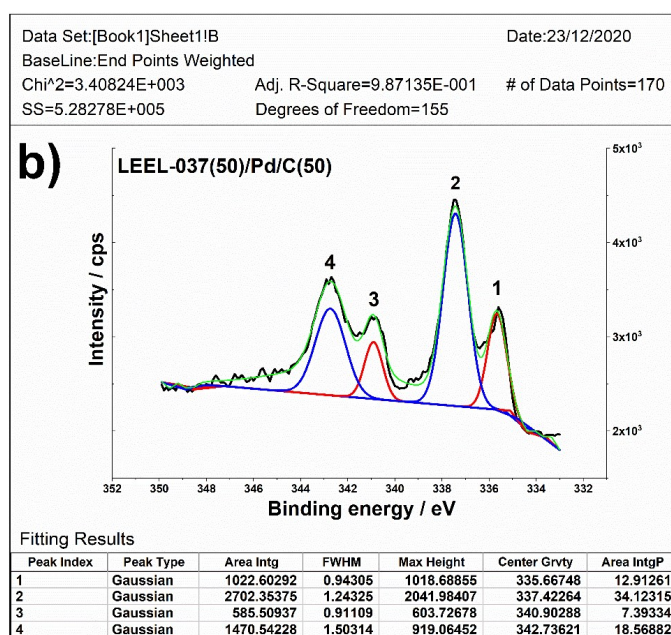

**Fig. S3 – Peaks analysis to determine the Pd and PdO percentage in a) Pd/C and b) LEEL-037(50)/Pd/C(50) electrocatalysts**

### Electrochemical surface area calculation

To calculate the ECSA, it is necessary to determine the coulombic charge ( $Q$ ) corresponding to the oxide reduction peak area from the current vs. potential ( $I$  vs.  $E$ ) CV plot. The following images for Pd/C (left) and LEEL-037(50)/Pd-C(50) (right) are depicted as an example to show the calculation:

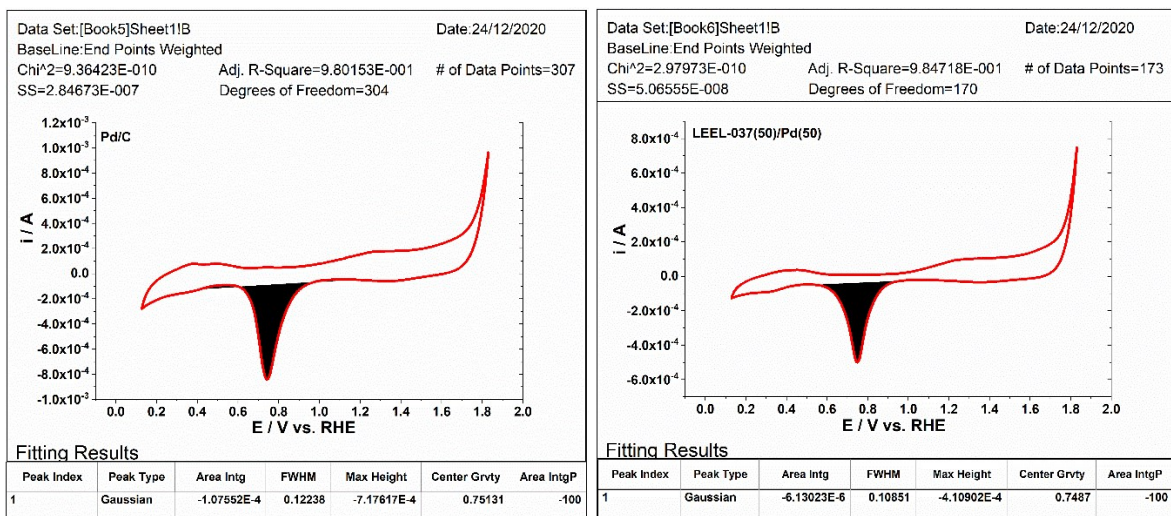

**Fig. S4 – Coulombic charge determination for Pd/C (left) and LEEL-037(50)/Pd-C(50) (right)**

The coulombic charge for Pd/C and LEEL-037(50)/Pd-C(50) electrocatalyst are 107.55  $\mu\text{A}\cdot\text{V}$  and 61.30  $\mu\text{A}\cdot\text{V}$ , respectively. The ECSA is defined as follows:

$$\text{ECSA} = \frac{Q}{Q_{PdO} * Pd_m * \nu} \quad (1)$$

where  $Q$  is the PdO coulombic charge ( $\mu\text{A}\cdot\text{V}$ ),  $Q_{PdO}$  is the charge required for the reduction of PdO monolayer, which is assumed as  $420 \mu\text{C cm}^{-2}$  [1,2]  $Pd_m$  is the Pd loading in “mg”, and  $\nu$  is the scan rate in  $\text{V s}^{-1}$  ( $0.05 \text{ V s}^{-1}$  for this experimentation). The mass percentage (wt.%) of bare Pd/C and LEEL-037/Pd-C electrodes is described in Table S1.

**Table S1. Electrocatalysts composition**

| Electrocatalyst       | Vulcan Carbon XC-72 (wt.%) | Vulcan Carbon XC-72 (mg) | Pd (wt.%) | Pd (mg) | LEEL-037 (wt.%) | LEEL-037 (mg) |
|-----------------------|----------------------------|--------------------------|-----------|---------|-----------------|---------------|
| Pd/C                  | 70                         | 7                        | 30        | 3       | 0               | 0             |
| LEEL-037(25)/Pd-C(75) | 52.5                       | 5.25                     | 22.5      | 2.25    | 25              | 2.5           |
| LEEL-037(50)/Pd-C(50) | 35                         | 3.5                      | 15        | 1.5     | 50              | 5             |
| LEEL-037(75)/Pd-C(25) | 15                         | 1.5                      | 7.5       | .75     | 75              | 7.5           |

To calculate the Pd loading for Pd/C and LEEL-037(50)/Pd-C(50), we know that we used 3  $\mu\text{L}$  of the electrocatalytic ink containing 10 mg of the electrocatalyst in turn, 1250  $\mu\text{L}$  of water, and 250  $\mu\text{L}$  of 5 wt.% Nafion<sup>®</sup> solution (density  $\approx 1 \text{ mg ml}^{-1}$ ). The Pd loading ( $Pd_m$ ) was calculated as follows:

For Pd/C electrocatalyst;

$$Pd_m = \frac{10 \text{ mg Pd/C}}{1.5 \text{ ml (water - Nafion)} * 0.003 \text{ ml (ink aliquot)} * 0.3 \text{ wt.\% Pd}} = 0.006 \text{ mg Pd}$$

For LEEL-037(50)/Pd-C(50) electrocatalyst;

$$Pd_m = \frac{10 \text{ mg LEEL} - 037(50)Pd/C(50)}{1.5 \text{ ml (water} - \text{Nafion)}} * 0.003 \text{ ml (ink aliquot)} * 0.15 \text{ wt.\% Pd} = 0.003 \text{ mg Pd}$$

Substituting the data in eq.1, the ECSAs for Pd/C and LEEL-037(50)/Pd-C(50) electrocatalyst are 85.36 m<sup>2</sup> g<sub>Pd</sub><sup>-1</sup> and 97.3 m<sup>2</sup> g<sub>Pd</sub><sup>-1</sup>, respectively.

**Table S2. Comparison of physicochemical and electrocatalytic properties for Ru and Ir free electrocatalysts used to carry out the OER in alkaline medium.**

| Material                                      | Operational overpotential at 10 mA/cm <sup>2</sup> (mV) | Tafel slope (mV dec <sup>-1</sup> ) | Crystal size (nm) | Electrolyte | Reference |
|-----------------------------------------------|---------------------------------------------------------|-------------------------------------|-------------------|-------------|-----------|
| LEEL-037(25)/Pd-C(75)                         | 430                                                     | 173                                 | 30.80*            | KOH 0.5 M   | This work |
| LEEL-037                                      | 480                                                     | 104                                 | 35.80             | KOH 0.5 M   | This work |
| Ni-Co@carbon                                  | 243                                                     | 67                                  | ---               | KOH 1.0 M   | [3]       |
| Co <sub>3</sub> O <sub>4</sub> /NC            | 325                                                     | 80                                  | ---               | KOH 1.0 M   | [4]       |
| Ni-BDC                                        | 360                                                     | 57                                  | 45.03             | KOH 1.0 M   | [5]       |
| Ni <sub>0.75</sub> Fe <sub>0.25</sub> BDC     | 310                                                     | 43.7                                | 17.11             | KOH 0.1 M   | [6]       |
| Fe@BIF-91                                     | 350                                                     | 71                                  | 63.72             | KOH 1.0 M   | [7]       |
| ZIF-67/CoNiAl-LDH/NF                          | 303                                                     | 88                                  | 46.23             | KOH 1.0 M   | [8]       |
| FeNi@CNF                                      | 356                                                     | 62.6                                | 21.89             | KOH 1.0 M   | [9]       |
| β-Ni(OH)2/Cu <sub>2</sub> S hybrid nanosheets | 500                                                     | 89                                  | 29.1              | KOH 0.1 M   | [10]      |
| NiTe                                          | 388                                                     | 117                                 | 27.98             | KOH 1.0 M   | [11]      |
| Co <sub>3</sub> O <sub>4</sub>                | 394                                                     | 149.6                               | 14.36             | KOH 1.0 M   | [12]      |
| Fe <sub>2</sub> P@NPC                         | 510                                                     | 140                                 | -----             | KOH 1.0 M   | [13]      |
| NiFeP@PC                                      | 460                                                     | 131                                 | 25.68             |             |           |
| Ni <sub>2</sub> P@NPC                         | 440                                                     | 110                                 | 13                |             |           |
| Ni <sub>1.5</sub> Fe <sub>0.5</sub> P@NPC     | 410                                                     | 87                                  | 26.9              |             |           |
| CoP@NG                                        | 354                                                     | 63.8                                | 17.95             | KOH 1.0 M   | [14]      |
| ZnO@NMC nanocomposite                         | 570                                                     | 318                                 | 41.75             | KOH 0.5 M   | [15]      |

\*Crystallite size calculated at the main diffraction peak (2θ) for Pd/C (40.3°).

**Table S3. Calculated values of the equivalent circuit elements for the samples**

| Sample                | Rs (Ω) | CPE-T                 | CPE-P  | Rct (Ω) | x <sup>2</sup>       |
|-----------------------|--------|-----------------------|--------|---------|----------------------|
| Pd/C                  | 32.22  | 3.8X10 <sup>-4</sup>  | 0.8176 | 80.13   | 2.5X10 <sup>-3</sup> |
| MOF                   | 32.85  | 1.8X10 <sup>-4</sup>  | 0.6886 | 64.20   | 1.9X10 <sup>-3</sup> |
| LEEL-037(25)/Pd-C(75) | 33.80  | 9 X10 <sup>-5</sup>   | 0.7558 | 36.42   | 2.6X10 <sup>-3</sup> |
| LEEL-037(50)/Pd-C(50) | 33.70  | 6.9 X10 <sup>-4</sup> | 0.6909 | 52.02   | 1.7X10 <sup>-3</sup> |
| LEEL-037(75)/Pd-C(25) | 33.23  | 2.2 X10 <sup>-4</sup> | 0.6968 | 64.27   | 2.2X10 <sup>-3</sup> |

## References

- [1] A.N. Correia, L.H. Mascaro, S.A.S. Machado, L.A. Avaca, Active surface area determination of Pd-Si alloys by H-adsorption, *Electrochim. Acta.* (1997). [https://doi.org/10.1016/S0013-4686\(96\)00232-0](https://doi.org/10.1016/S0013-4686(96)00232-0).
- [2] D.A.J. Rand, R. Woods, The nature of adsorbed oxygen on rhodium, palladium and gold electrodes, *J. Electroanal. Chem.* (1971). [https://doi.org/10.1016/S0022-0728\(71\)80039-6](https://doi.org/10.1016/S0022-0728(71)80039-6).
- [3] G. Wu, S. Liu, G. Cheng, H. Li, Y. Liu, Ni-Co@carbon nanosheet derived from nickelocene doped Co-BDC for efficient oxygen evolution reaction, *Appl. Surf. Sci.* 545 (2021) 148975. <https://doi.org/10.1016/j.apsusc.2021.148975>.
- [4] H. Li, M. Tan, C. Huang, W. Luo, S.F. Yin, W. Yang, Co<sub>2</sub>(OH)<sub>3</sub>Cl and MOF mediated synthesis of porous Co<sub>3</sub>O<sub>4</sub>/NC nanosheets for efficient OER catalysis, *Appl. Surf. Sci.* 542 (2021) 148739. <https://doi.org/10.1016/j.apsusc.2020.148739>.
- [5] D. Zhu, J. Liu, L. Wang, Y. Du, Y. Zheng, K. Davey, S.Z. Qiao, A 2D metal-organic framework/Ni(OH)<sub>2</sub> heterostructure for an enhanced oxygen evolution reaction, *Nanoscale.* 11 (2019) 3599–3605. <https://doi.org/10.1039/c8nr09680e>.
- [6] Y. Hao, Q. Liu, Y. Zhou, Z. Yuan, Y. Fan, Z. Ke, C. Su, G. Li, A 2D NiFe Bimetallic Metal–Organic Frameworks for Efficient Oxygen Evolution Electrocatalysis, *ENERGY Environ. Mater.* (2019). <https://doi.org/10.1002/eem2.12024>.
- [7] T. Wen, Y. Zheng, J. Zhang, K. Davey, S.Z. Qiao, Co (II) Boron Imidazolate Framework with Rigid Auxiliary Linkers for Stable Electrocatalytic Oxygen Evolution Reaction, *Adv. Sci.* (2019). <https://doi.org/10.1002/advs.201801920>.
- [8] J. Xu, Y. Zhao, M. Li, G. Fan, L. Yang, F. Li, A strong coupled 2D metal-organic framework and ternary layered double hydroxide hierarchical nanocomposite as an excellent electrocatalyst for the oxygen evolution reaction, *Electrochim. Acta.* (2019). <https://doi.org/10.1016/j.electacta.2019.03.210>.
- [9] Y. Li, M. Lu, P. He, Y. Wu, J. Wang, D. Chen, H. Xu, J. Gao, J. Yao, Bimetallic Metal-Organic Framework-Derived Nanosheet-Assembled Nanoflower Electrocatalysts for Efficient Oxygen Evolution Reaction, *Chem. - An Asian J.* (2019). <https://doi.org/10.1002/asia.201900328>.
- [10] D. Yang, L. Gao, J.H. Yang, Facile synthesis of ultrathin Ni(OH)<sub>2</sub>-Cu<sub>2</sub>S hexagonal nanosheets hybrid for oxygen evolution reaction, *J. Power Sources.* (2017). <https://doi.org/10.1016/j.jpowsour.2017.05.034>.
- [11] L. Zhong, Y. Bao, X. Yu, L. Feng, An Fe-doped NiTe bulk crystal as a robust catalyst for the electrochemical oxygen evolution reaction, *Chem. Commun.* (2019). <https://doi.org/10.1039/c9cc04429a>.
- [12] Z. Liu, Z. Xiao, G. Luo, R. Chen, C.L. Dong, X. Chen, J. Cen, H. Yang, Y. Wang, D. Su, Y. Li, S. Wang, Defects-Induced In-Plane Heterophase in Cobalt Oxide Nanosheets for Oxygen Evolution Reaction, *Small.* (2019). <https://doi.org/10.1002/sml.201904903>.

- [13] J. Wang, F. Ciucci, In-situ synthesis of bimetallic phosphide with carbon tubes as an active electrocatalyst for oxygen evolution reaction, *Appl. Catal. B Environ.* (2019). <https://doi.org/10.1016/j.apcatb.2019.05.009>.
- [14] Y. Lu, W. Hou, D. Yang, Y. Chen, CoP nanosheets in-situ grown on N-doped graphene as an efficient and stable bifunctional electrocatalyst for hydrogen and oxygen evolution reactions, *Electrochim. Acta.* (2019). <https://doi.org/10.1016/j.electacta.2019.03.208>.
- [15] M. Ubaidullah, A.M. Al-Enizi, S. Shaikh, M.A. Ghanem, R.S. Mane, Waste PET plastic derived ZnO@NMC nanocomposite via MOF-5 construction for hydrogen and oxygen evolution reactions, *J. King Saud Univ. - Sci.* (2020). <https://doi.org/10.1016/j.jksus.2020.03.025>.
